# Supplementary figures and images for: Uncertainty alters the balance between incremental learning and episodic memory
Source: eLife journal article supplement (doi:10.7554/elife.81679), 2022-12-02

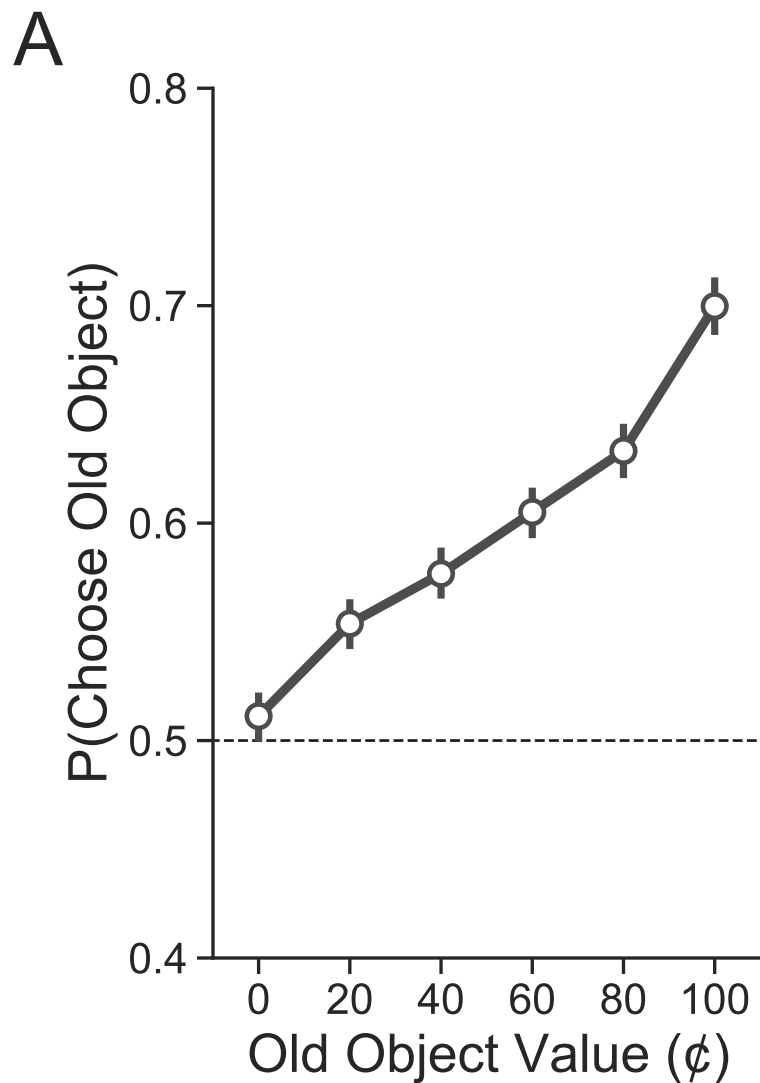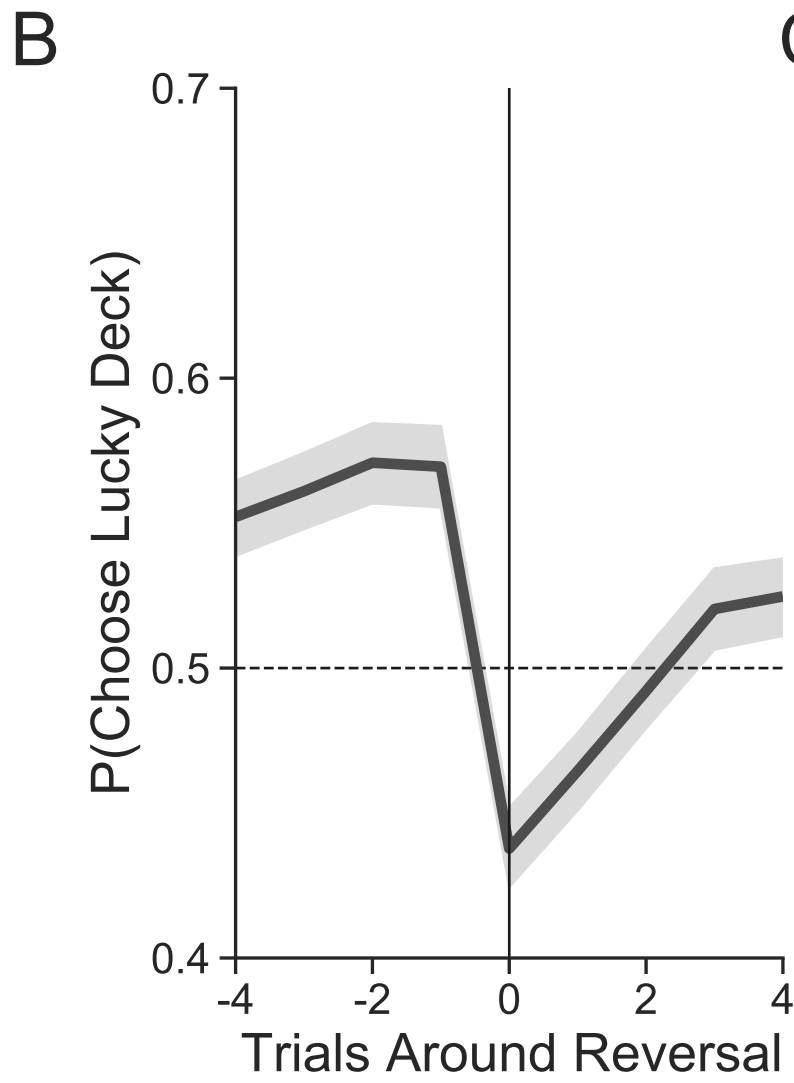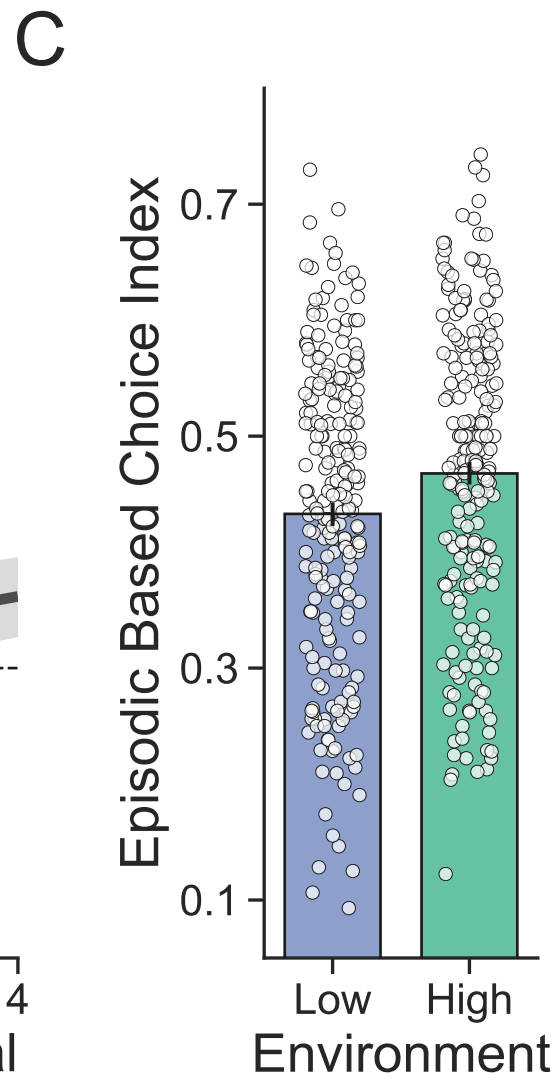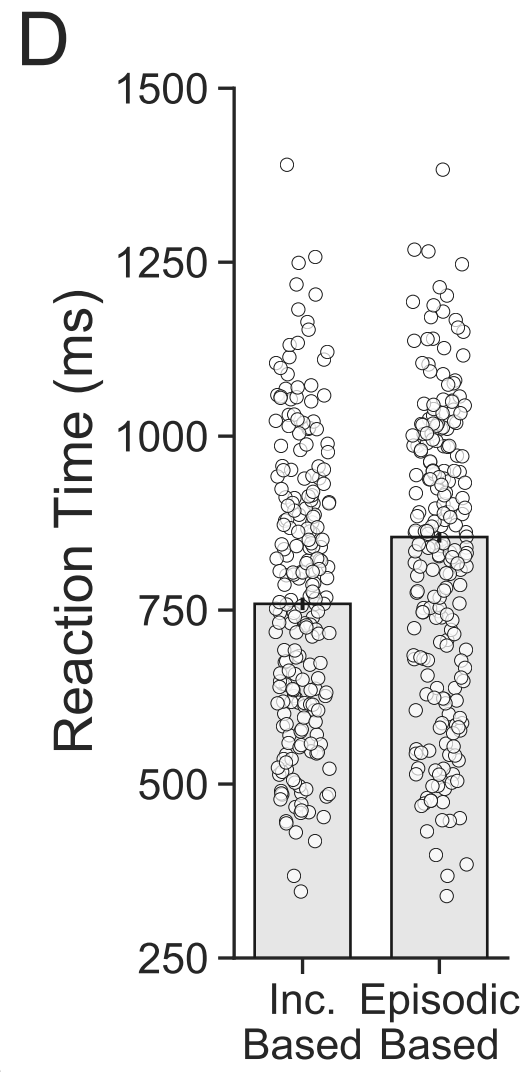

Supplement: supp [file elife_poa_e81679_Figure_2_figure_supplement_1.pdf › elife_poa_e81679_Figure_2_figure_supplement_1.pdf]

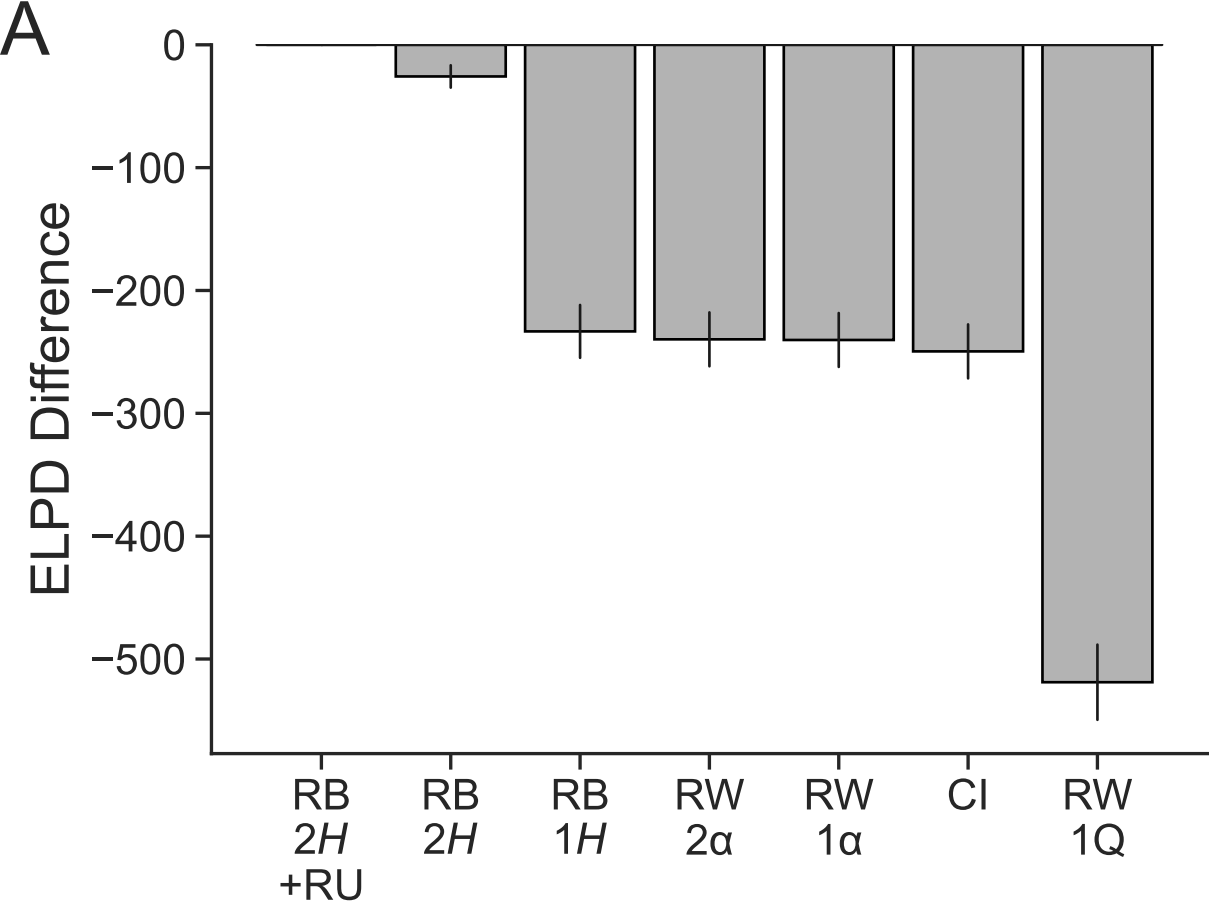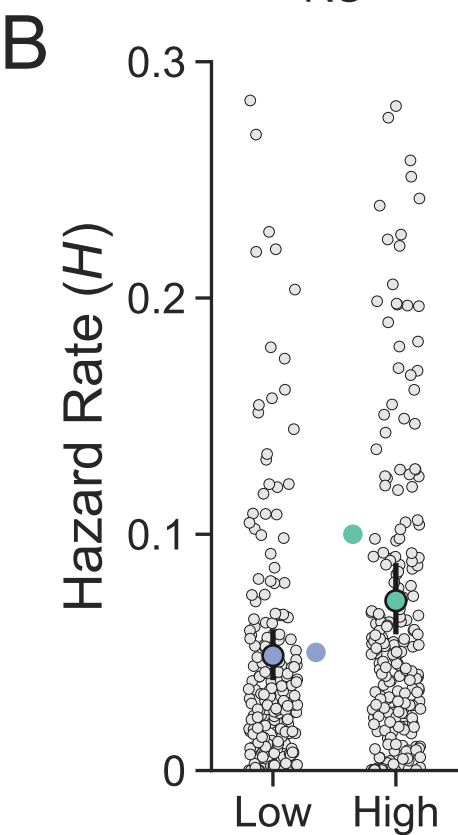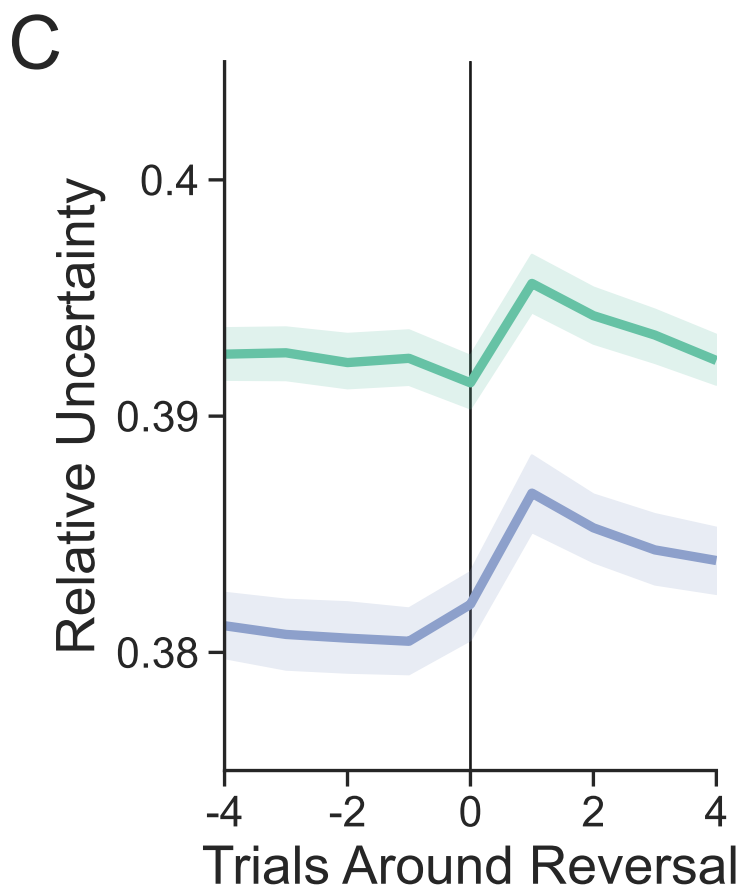

Supplement: supp [file elife_poa_e81679_Figure_3_figure_supplement_1.pdf › elife_poa_e81679_Figure_3_figure_supplement_1.pdf]

**A**

Episodic Based  
Choice Index

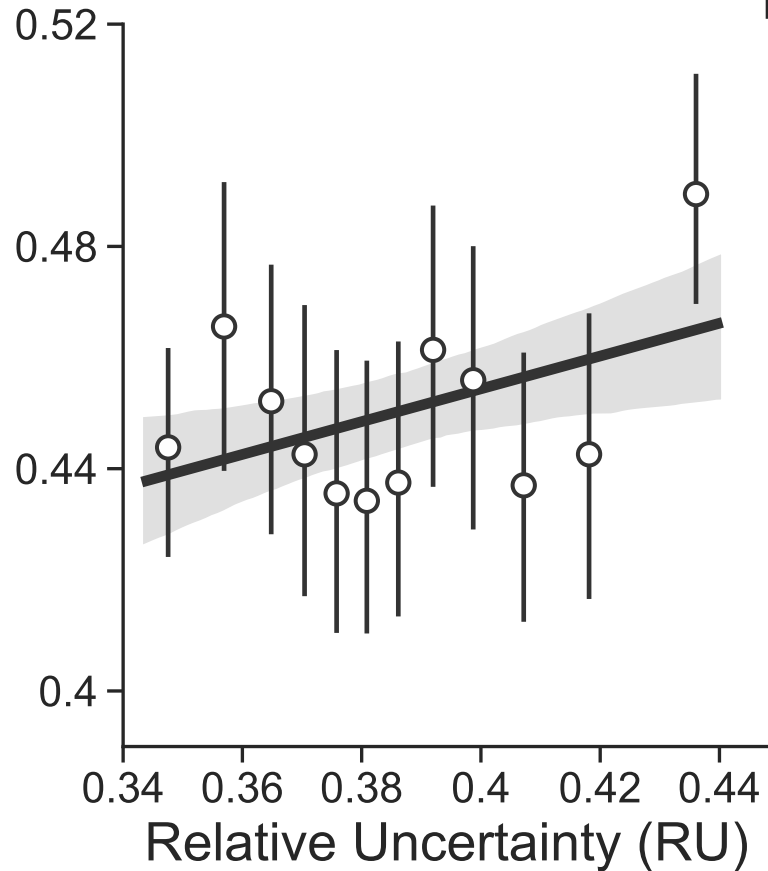**B**

Estimate (std.)

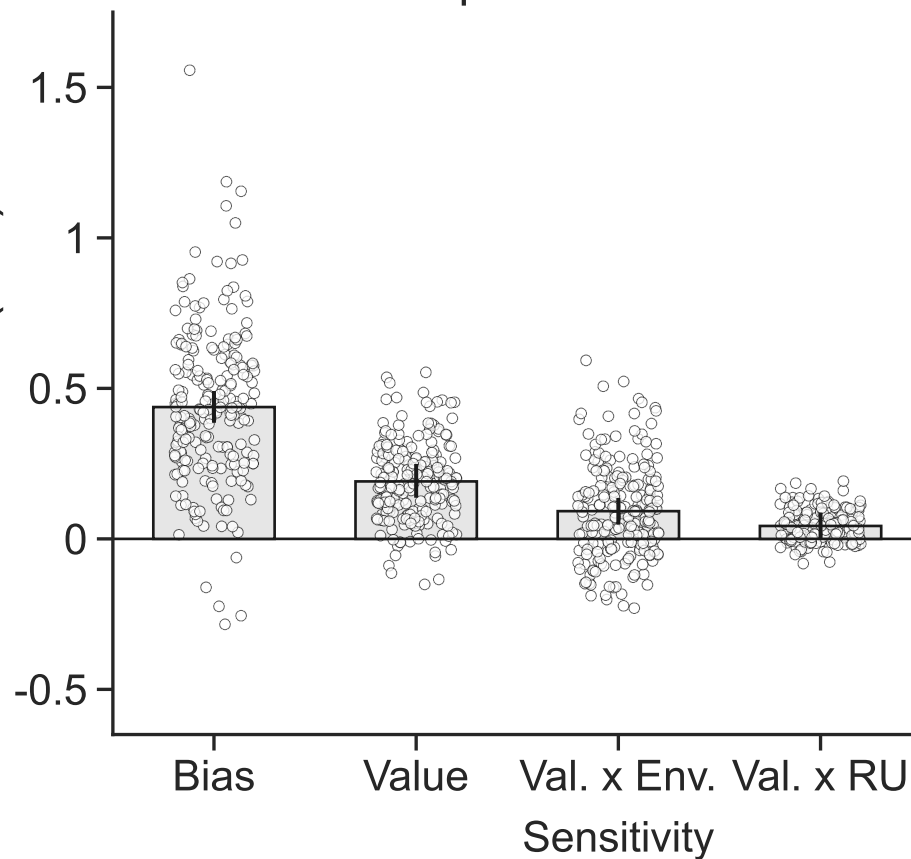

Estimate (std.)

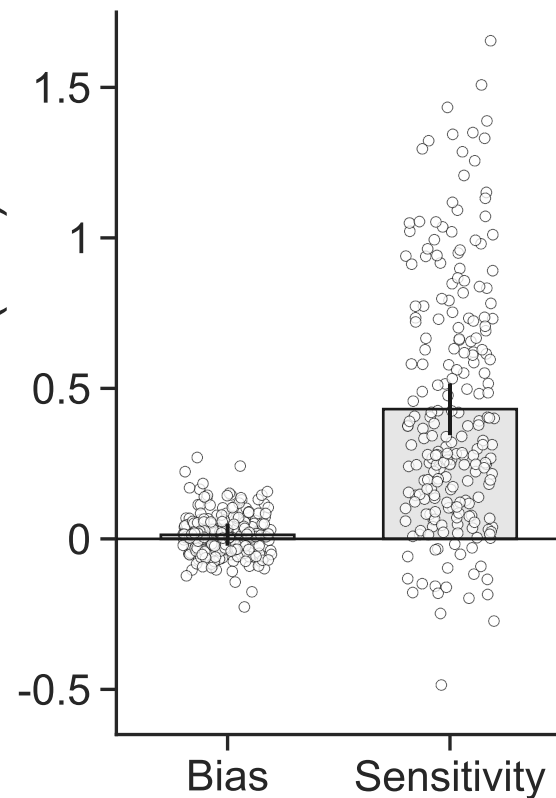

Supplement: supp [file elife_poa_e81679_Figure_4_figure_supplement_1.pdf › elife_poa_e81679_Figure_4_figure_supplement_1.pdf]

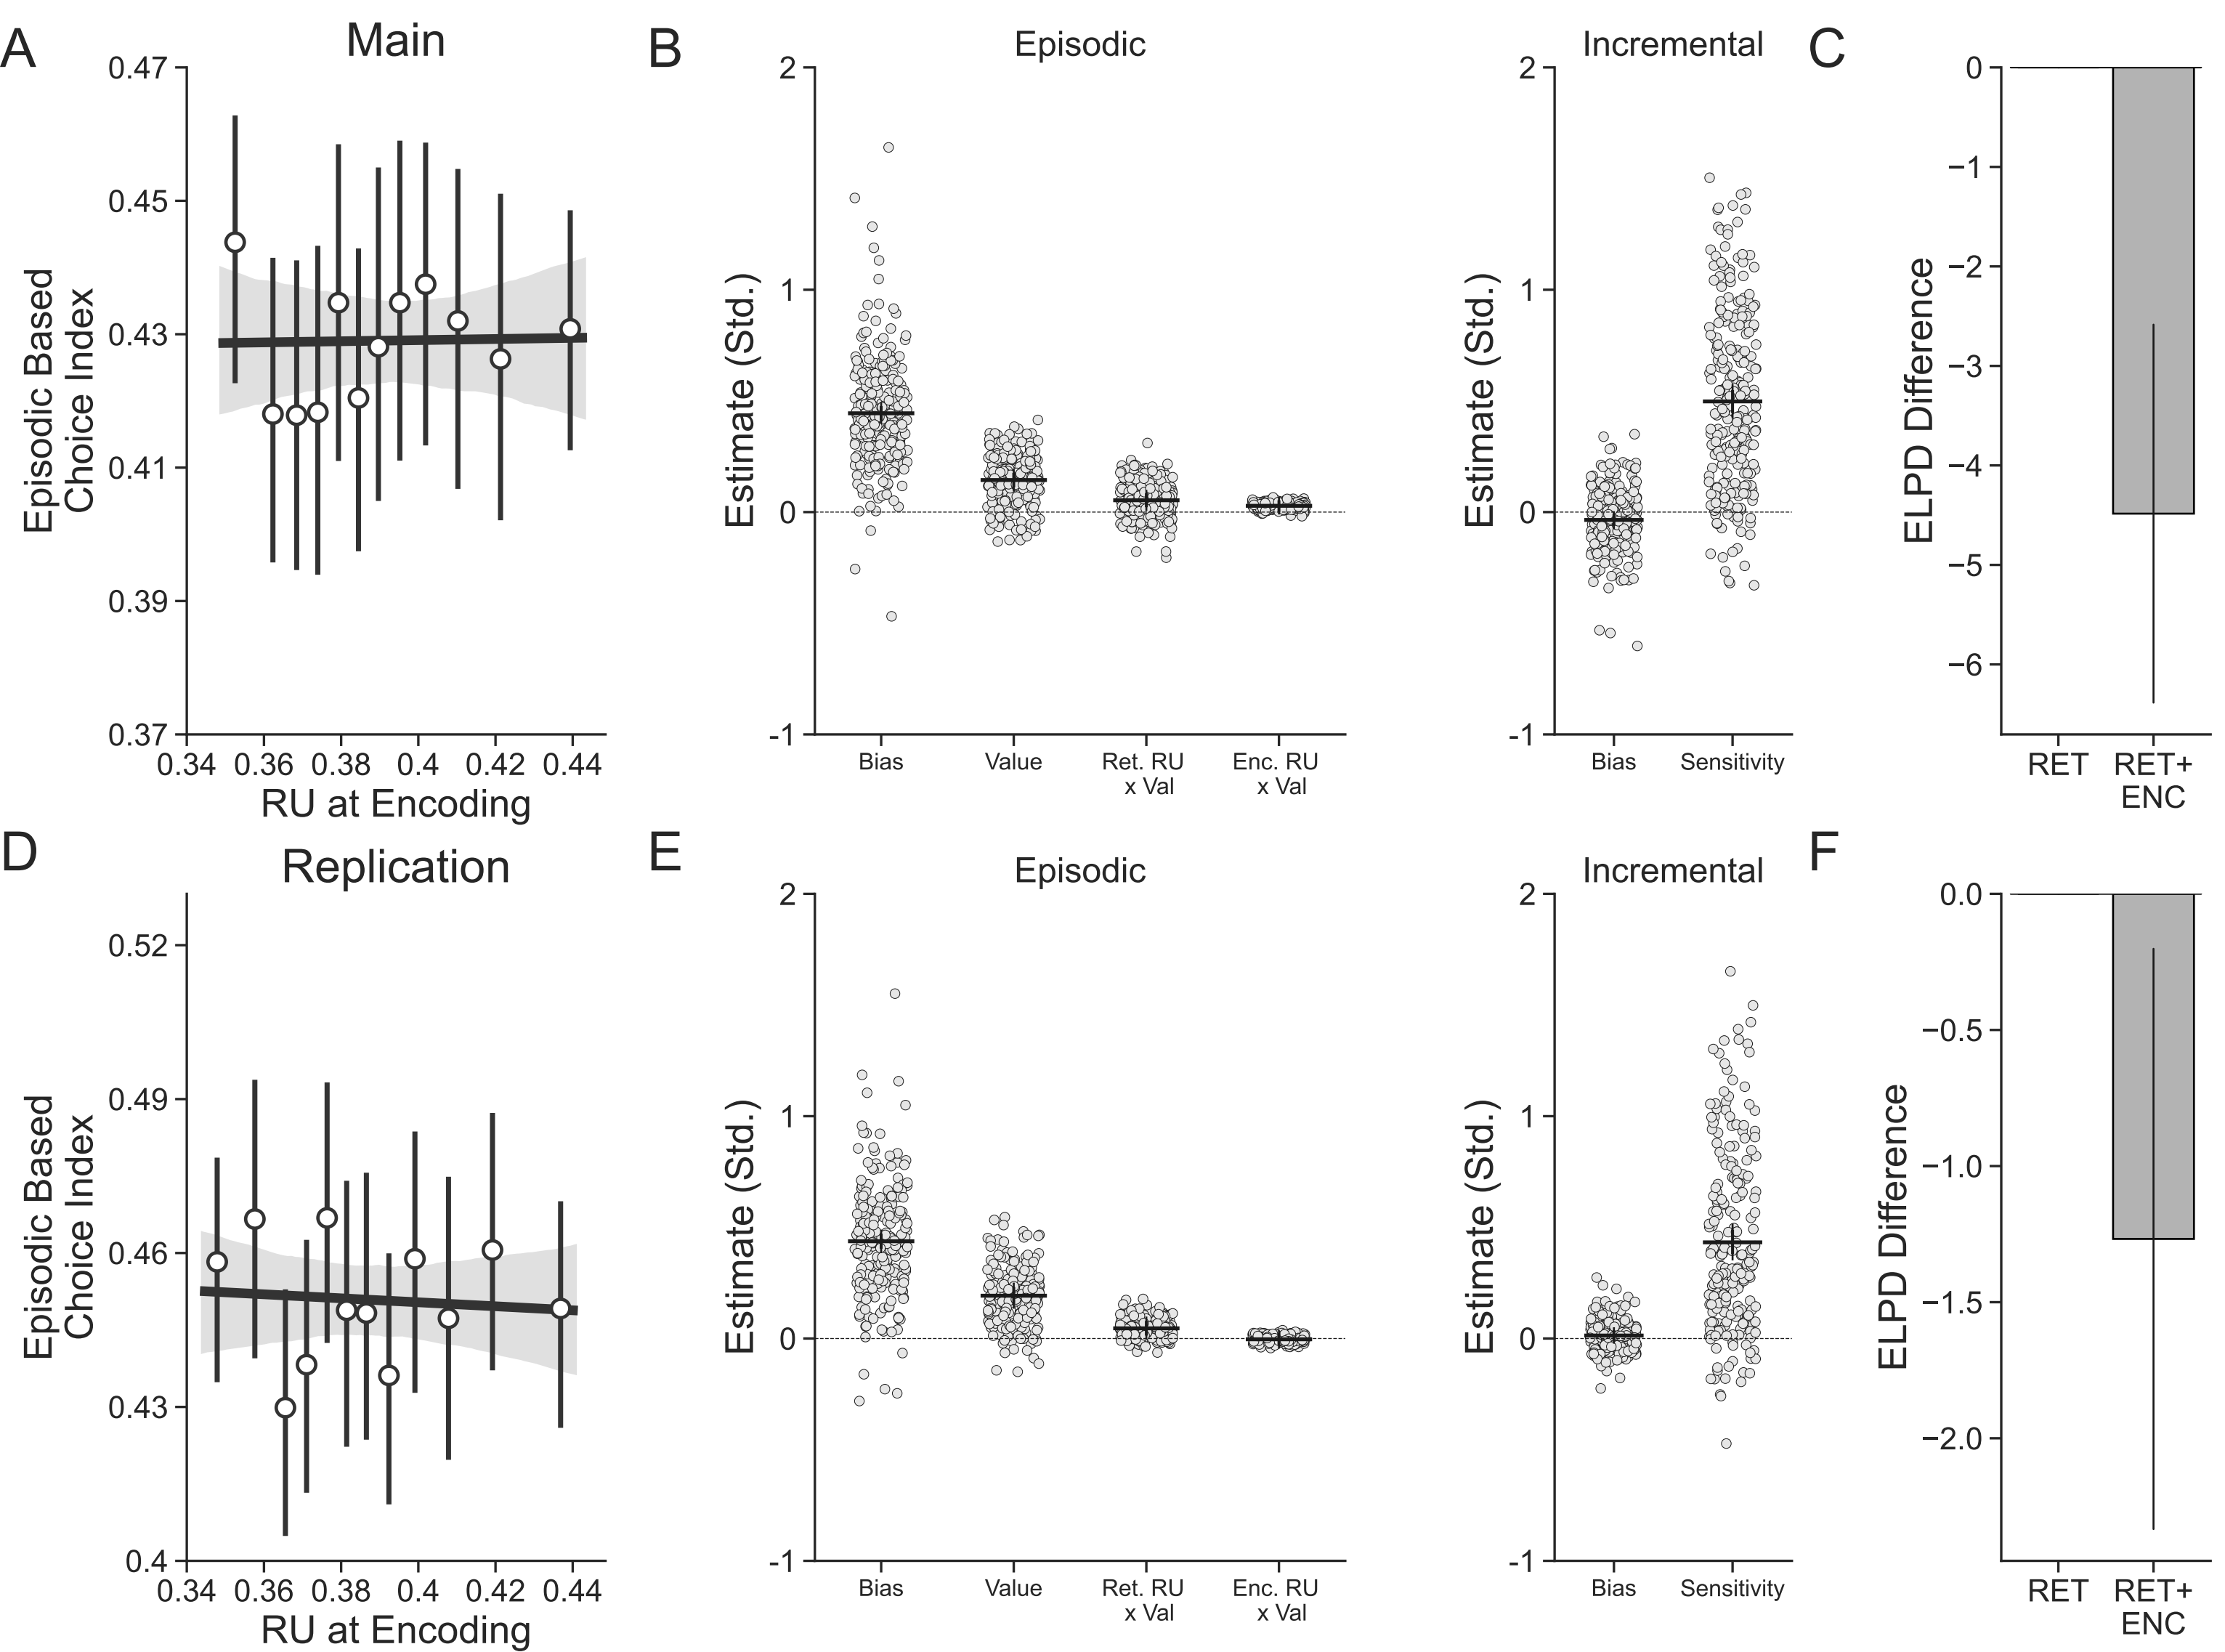

Supplement: supp [file elife_poa_e81679_Figure_4_figure_supplement_2.pdf › elife_poa_e81679_Figure_4_figure_supplement_2.pdf]

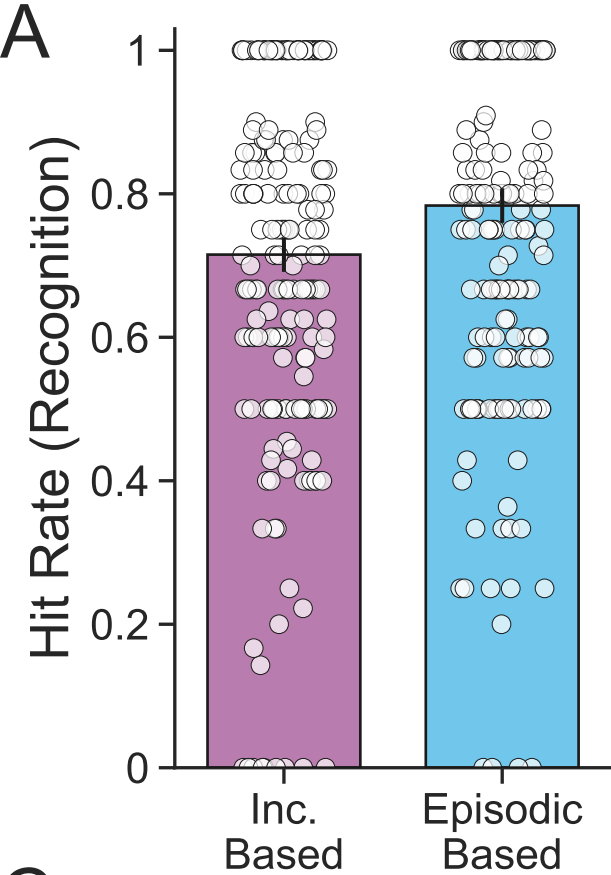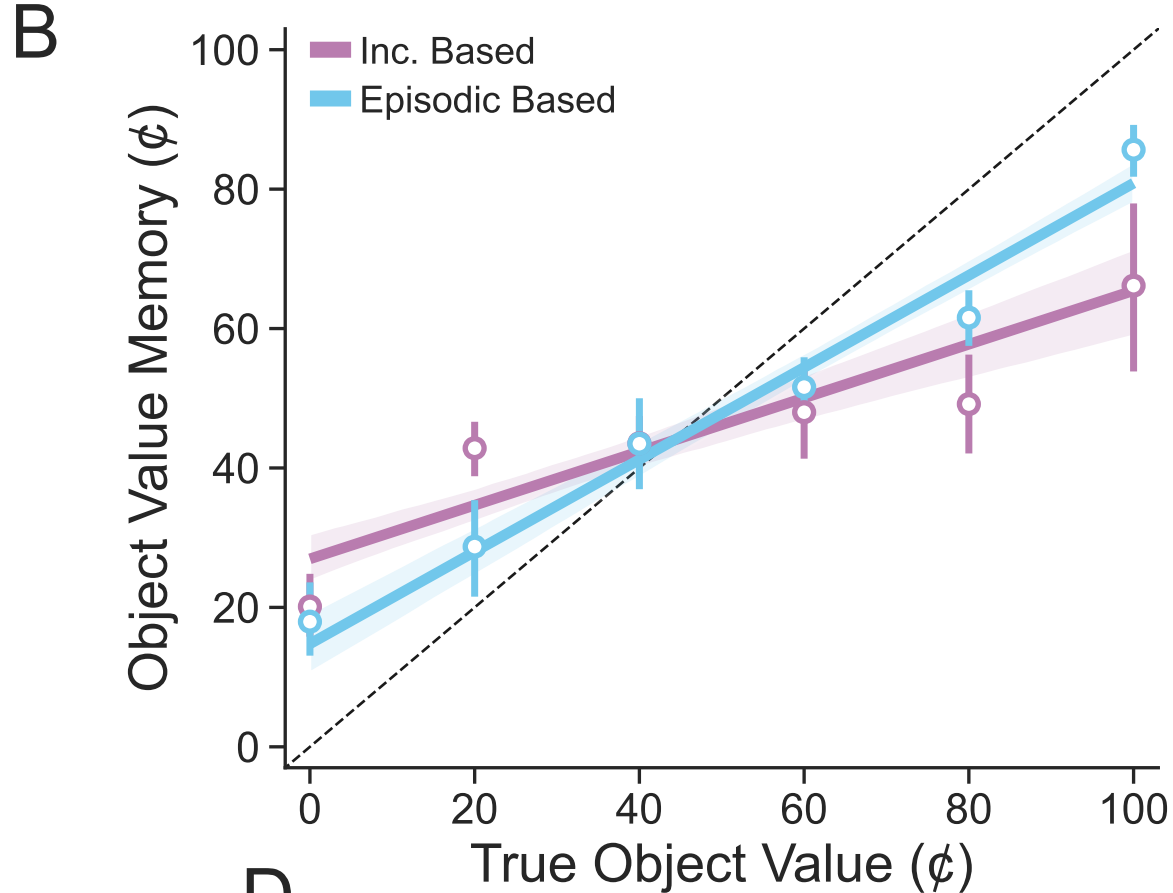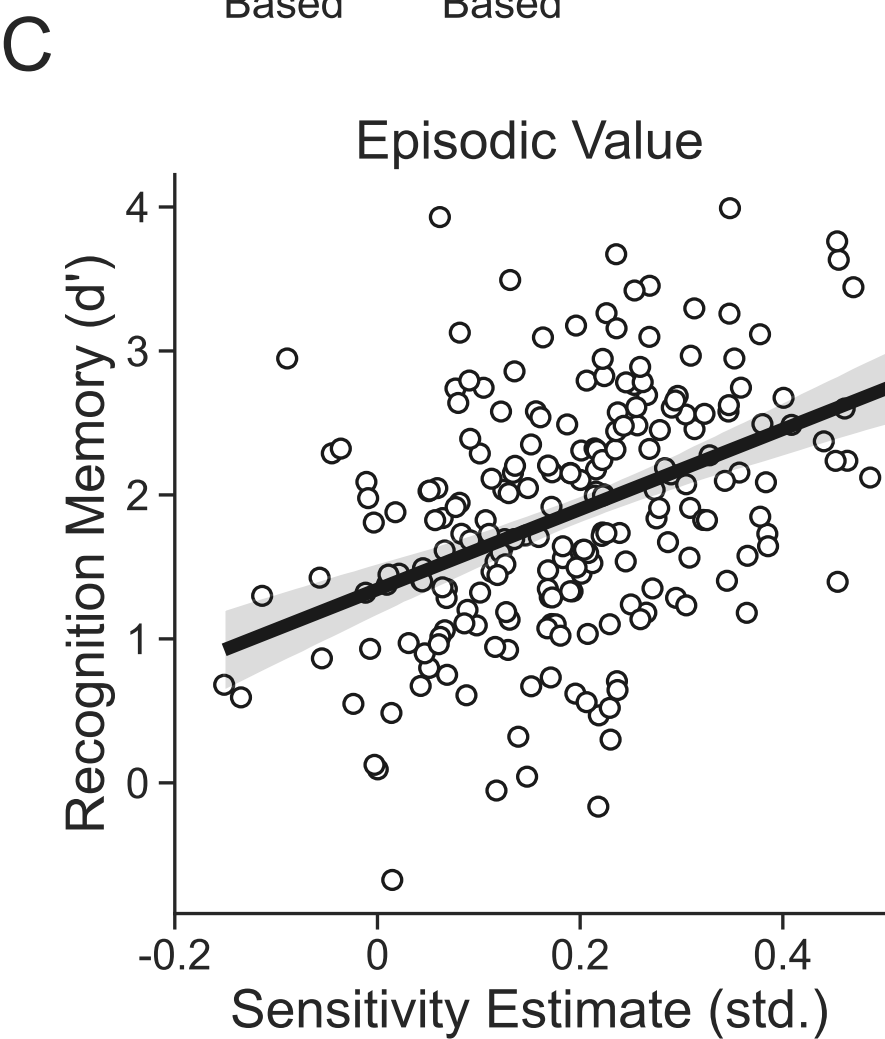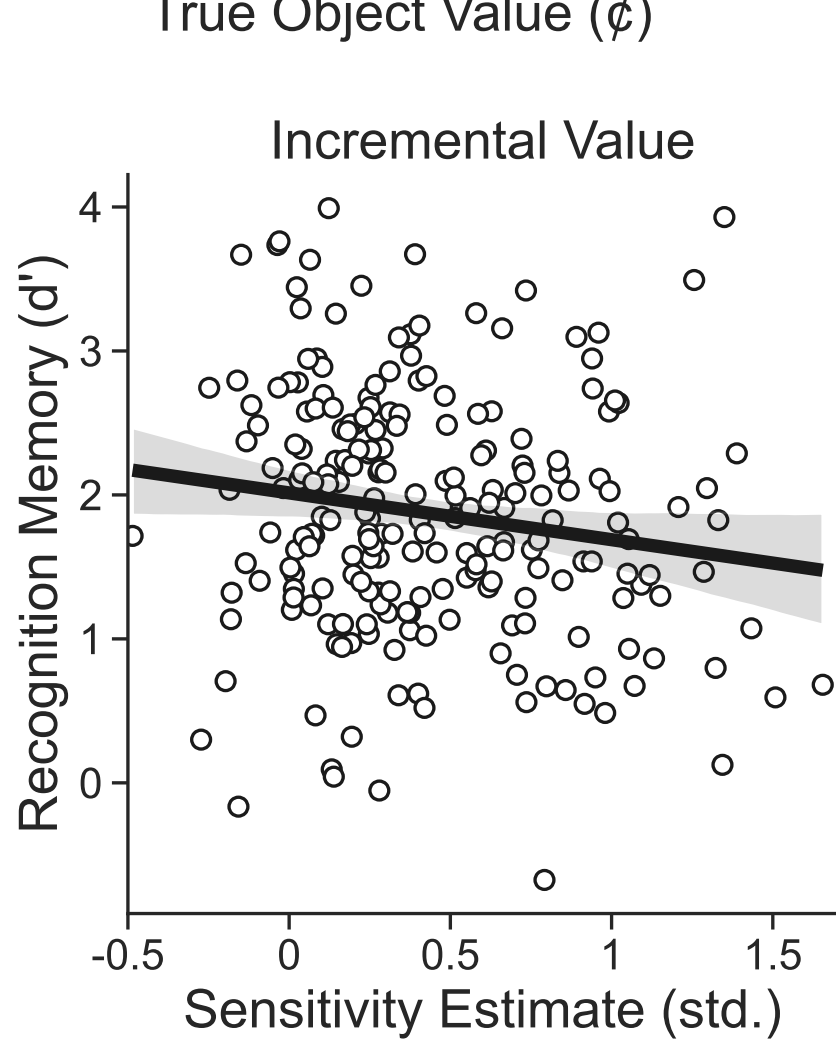

Supplement: supp [file elife_poa_e81679_Figure_5_figure_supplement_1.pdf › elife_poa_e81679_Figure_5_figure_supplement_1.pdf]

A

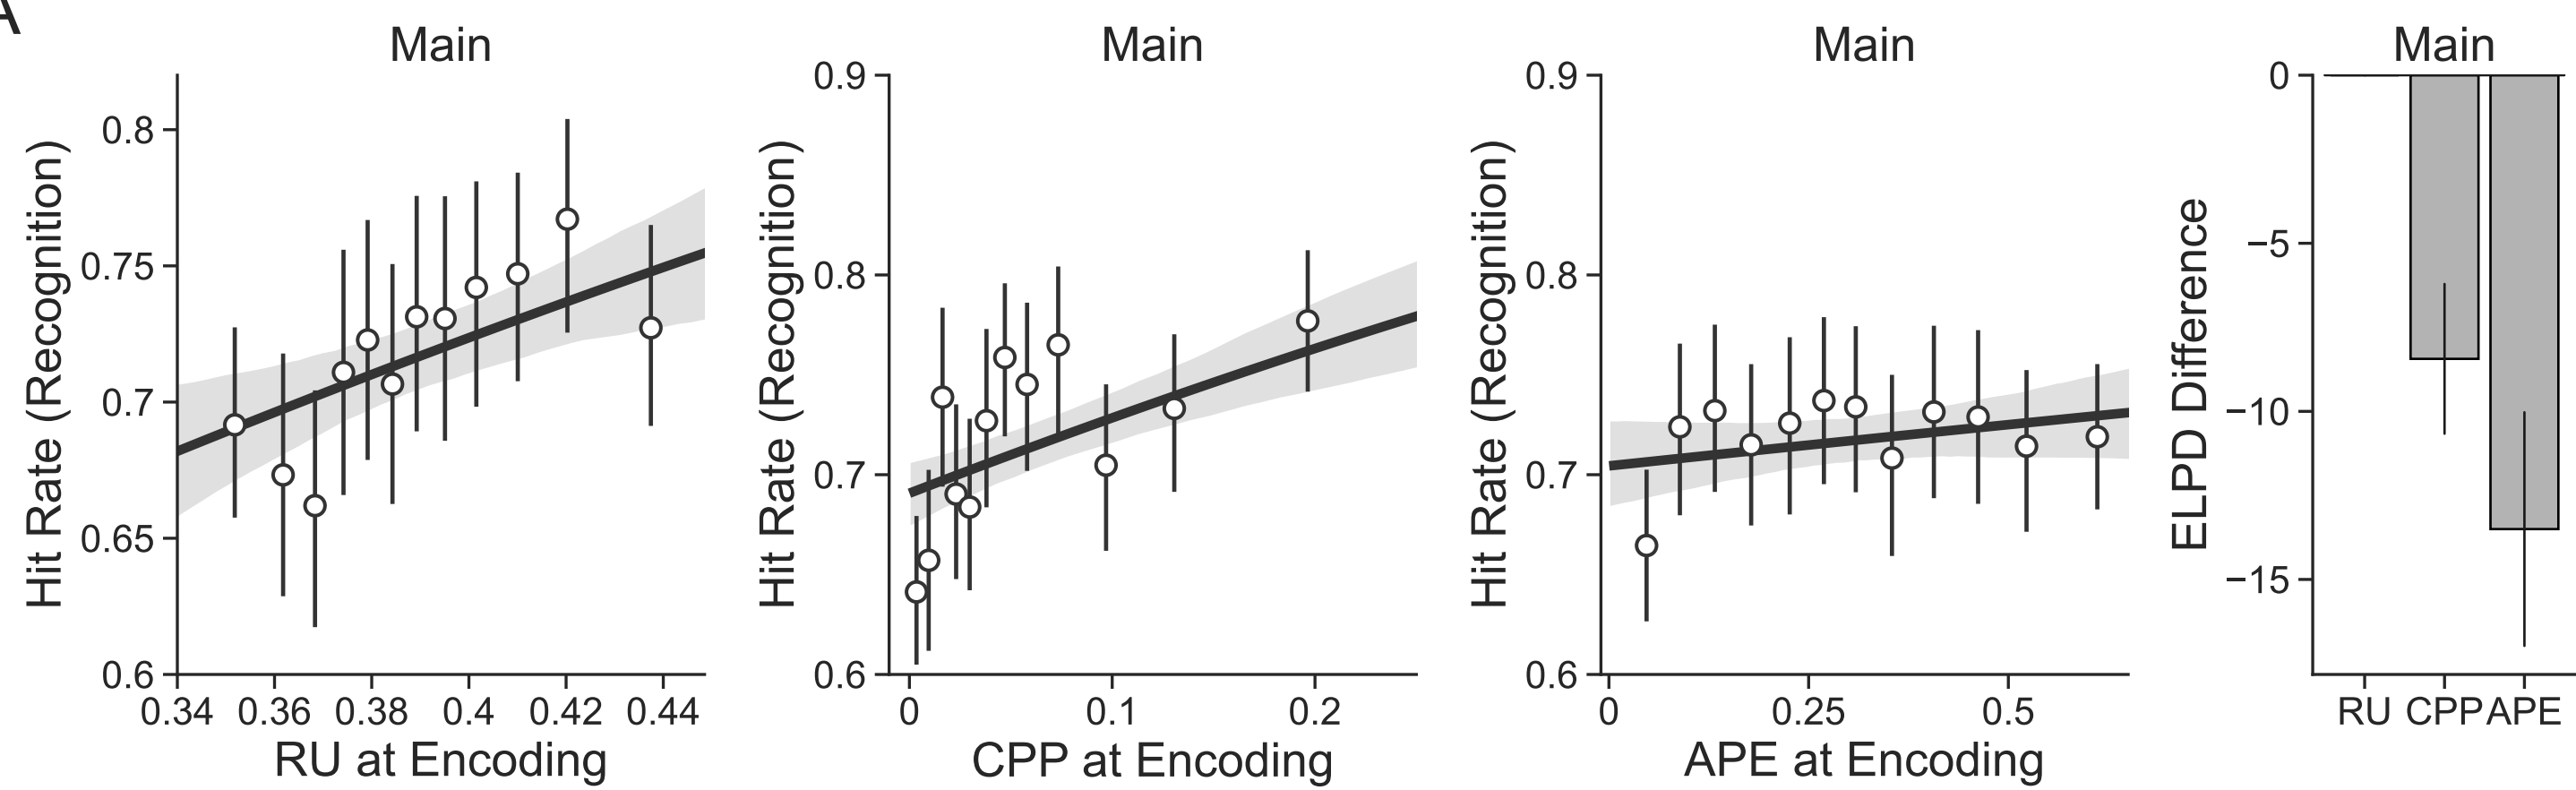

B

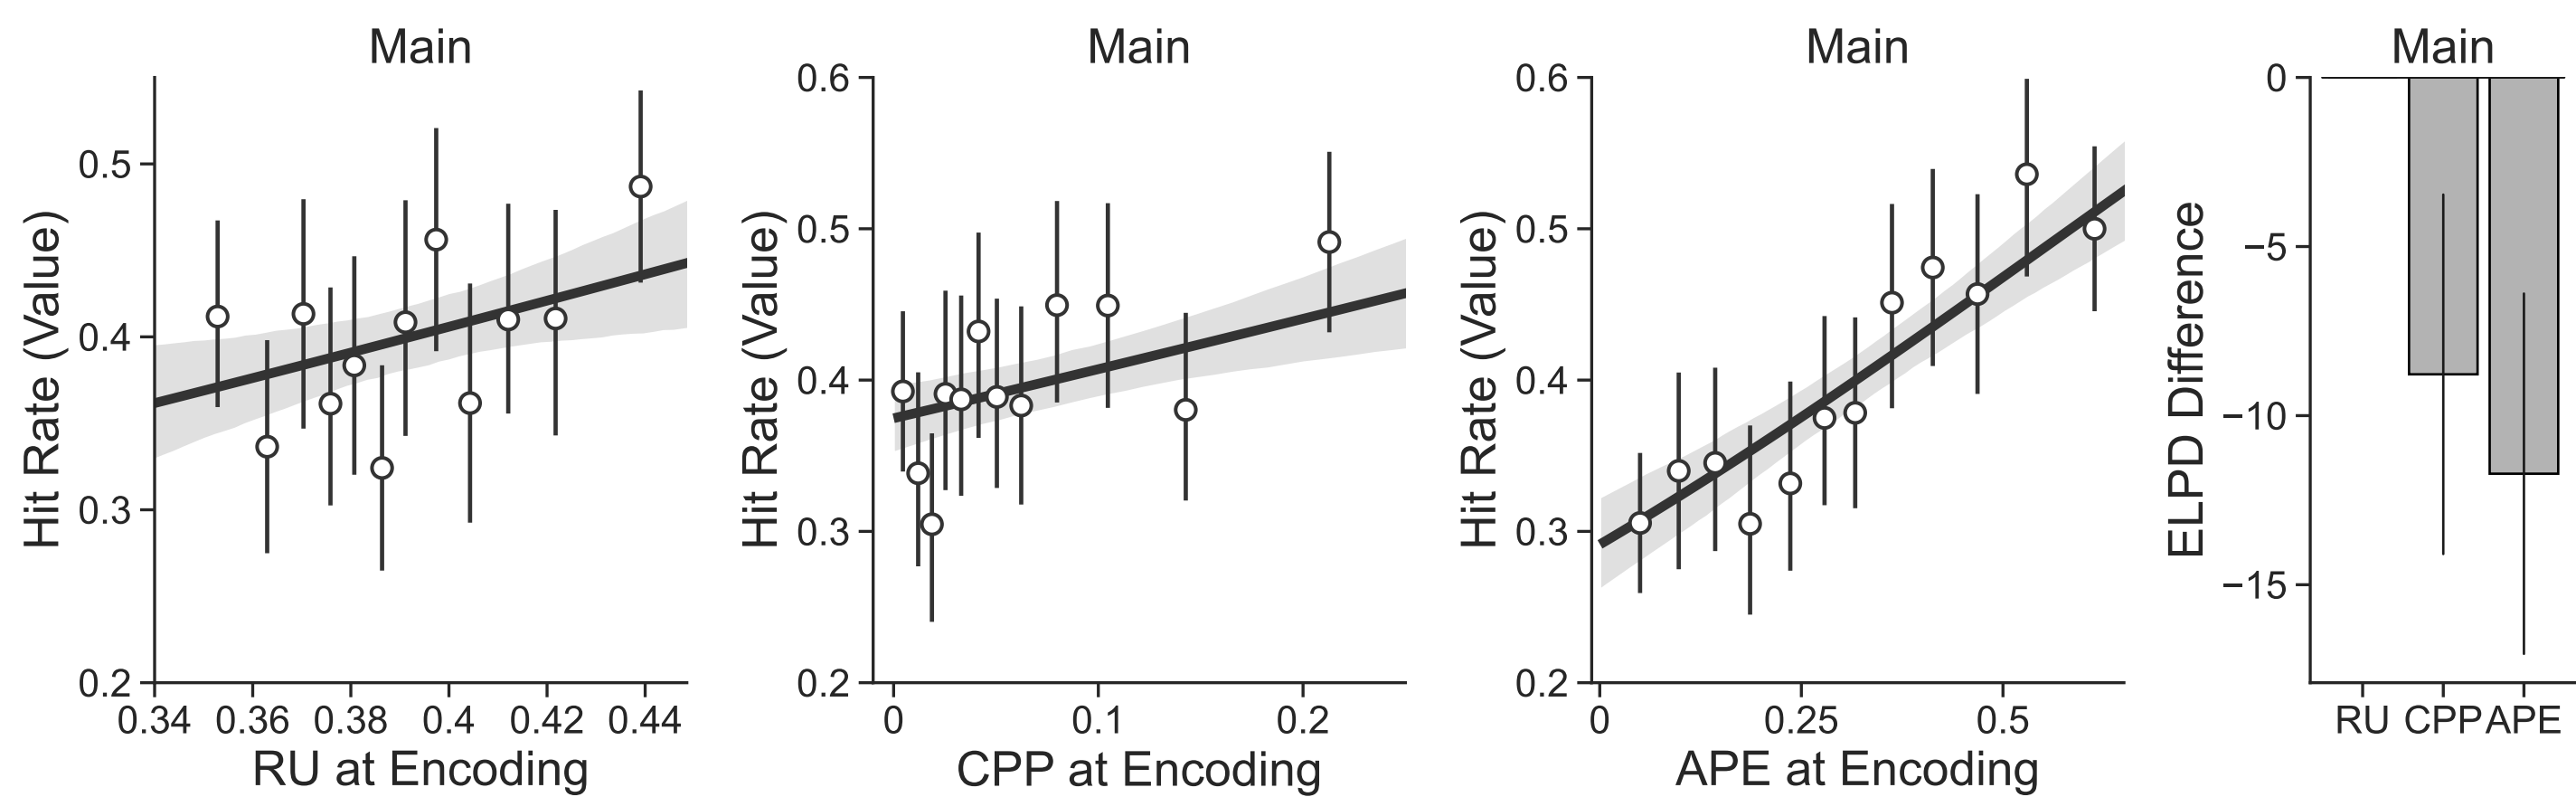

C

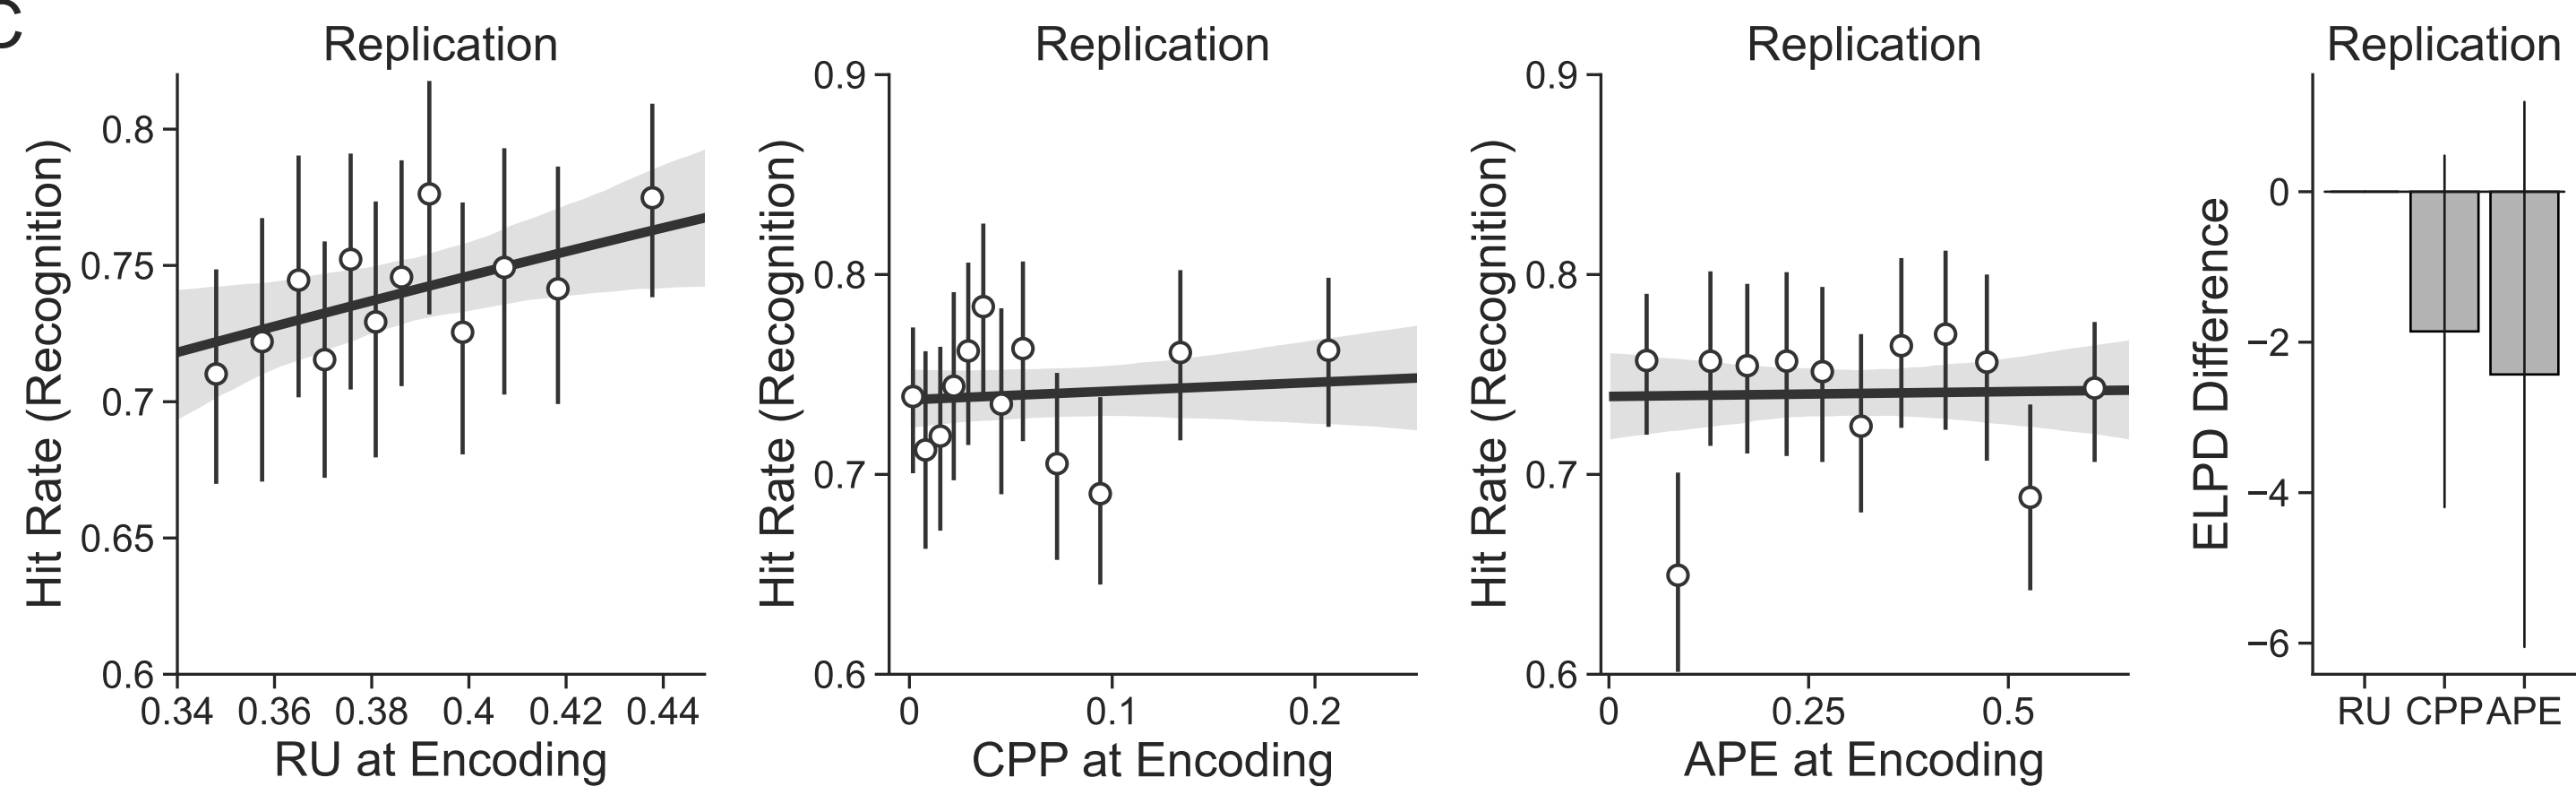

D

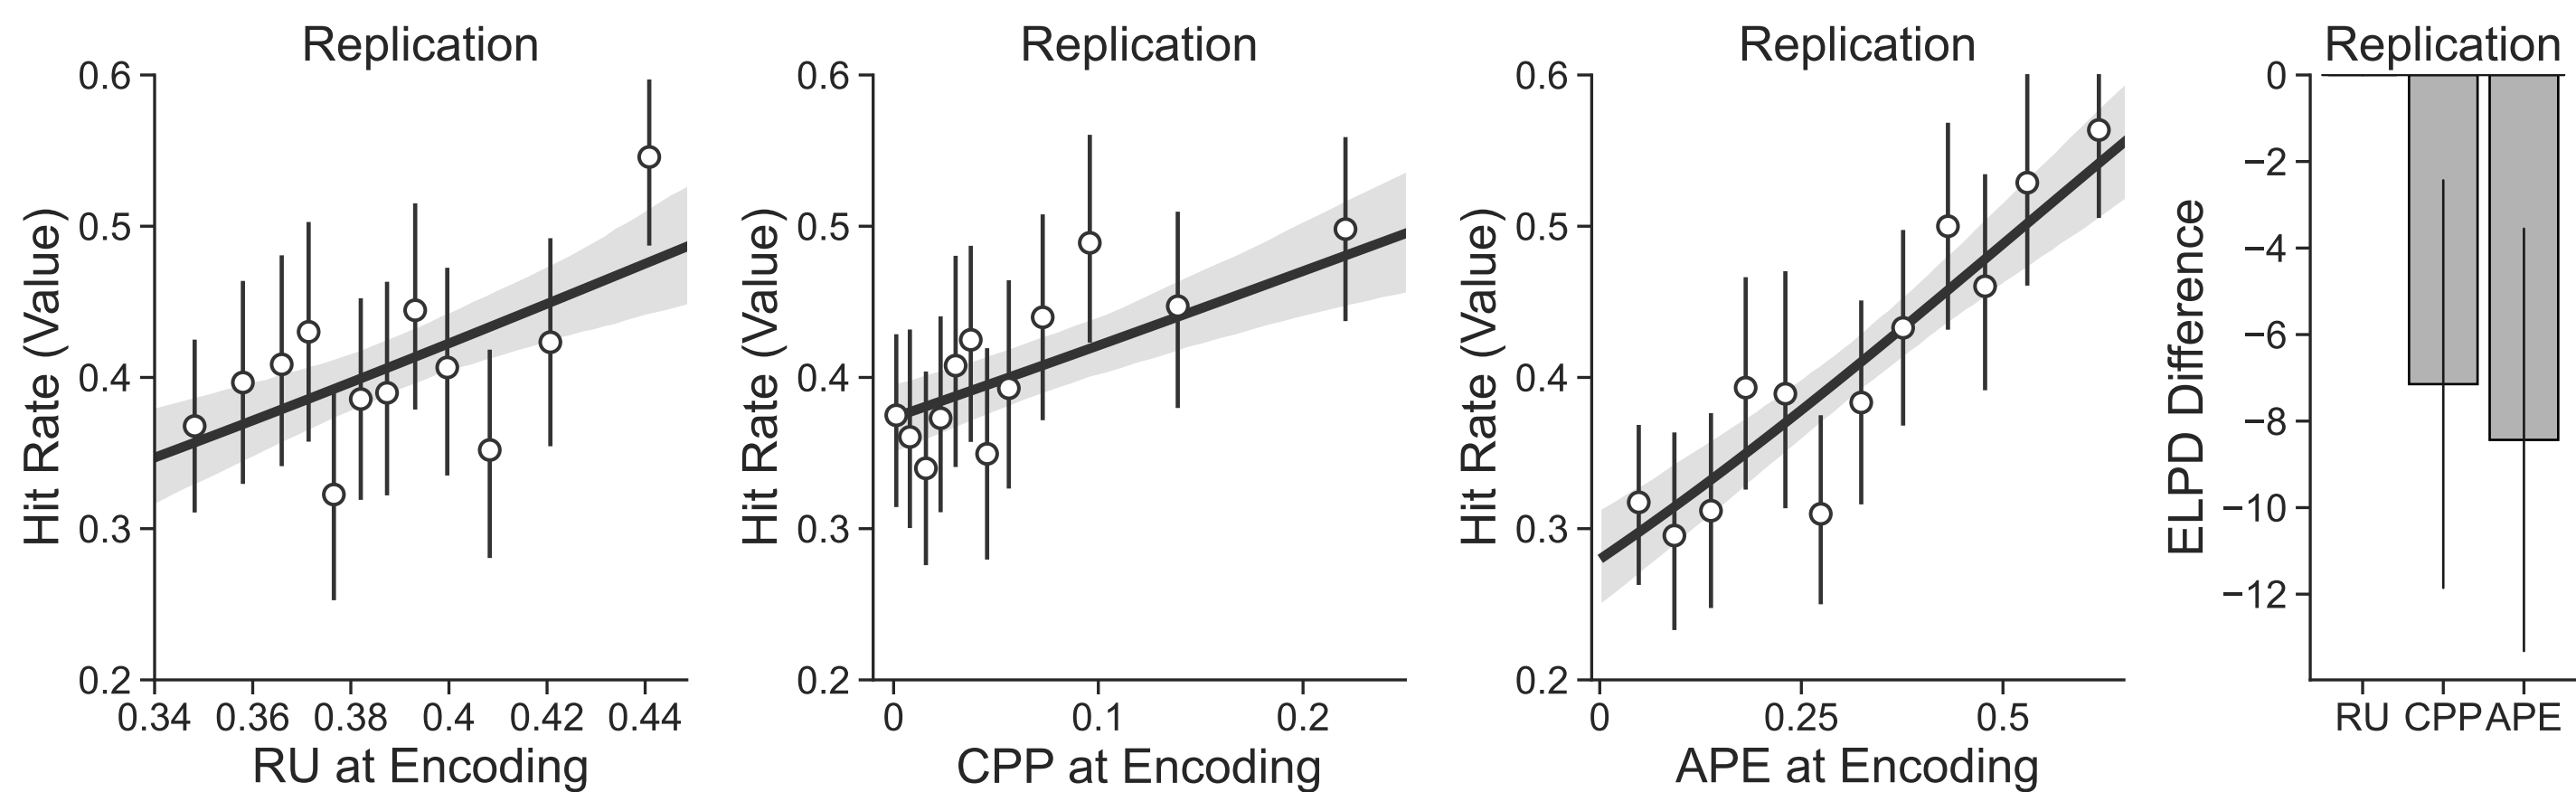

Supplement: supp [file elife_poa_e81679_Figure_5_figure_supplement_2.pdf › elife_poa_e81679_Figure_5_figure_supplement_2.pdf]
